# Supplementary material for: High-valence Mo doping for highly promoted water oxidation of NiFe (oxy)hydroxide
Source: Royal Society of Chemistry journal article supplement (doi:10.1039/d2ta05600c), 2022-01-01
Supplement: d2ta05600c1.pdf [file d2ta05600c1.pdf]

## Supporting Information

### High-valence Mo doping for highly promoted water oxidation of NiFe (oxy)hydroxide

*Liting Wei,<sup>a</sup> Mingyue Du,<sup>a</sup> Rui Zhao,<sup>a</sup> Fei Lv,<sup>a</sup> Lubing Li,<sup>a</sup> Lei Zhang,<sup>a</sup> Di Zhou<sup>b</sup> and Jinzhan Su<sup>\*a</sup>*

- a. International Research Center for Renewable Energy & State Key Laboratory of Multiphase Flow in Power Engineering, Xi'an Jiaotong University, Xi'an Shaanxi 710049 (P.R.China)
  - b. Electronic Materials Research Laboratory, Key Laboratory of the Ministry of Education & International Center for Dielectric Research, School of Electronic and Information Engineering, Xi'an Jiaotong University, Xi'an 710049, Shaanxi, China
- \* Corresponding author at International Research Center for Renewable Energy & State Key Laboratory of Multiphase Flow in Power Engineering, Xi'an Jiaotong University, Xi'an Shaanxi 710049, P.R.China. E-mail: [j.su@mail.xjtu.edu.cn](mailto:j.su@mail.xjtu.edu.cn)

## **Experimental**

### **Catalysts synthesis**

The NiFeMo (loading amount: 5.0 mg/cm<sup>2</sup>) catalysts were prepared via electrodeposition in a standard three-electrode configuration with CHI 760D electrochemical workstation. The nickel foam (NF, 1.0 mm thickness, geometric area exposed to the solution: 1.0 × 1.0 cm<sup>2</sup>) was used as the working electrode, Pt foil and Ag/AgCl electrode (1 M KCl) served as the counter electrode and reference electrode, respectively. Before the electrodeposition, NF was cleaned in 3 M HCl aqueous solution for 30 min to remove the oxide from the surface, followed by sonication in ethanol and deionized water for 10 min subsequently. Typically, 0.9 mmol NiSO<sub>4</sub> · 6H<sub>2</sub>O (≥98.5%, Sinopharm), 0.2 mmol FeSO<sub>4</sub> · 7H<sub>2</sub>O (≥99.0%, Sinopharm), and 0.1 mmol Na<sub>2</sub>MoO<sub>4</sub> · 2H<sub>2</sub>O (≥99.0%, Sinopharm) were dissolved in 20 mL DI water as the electrodeposition electrolyte. Boric acid (≥99.5%, Sinopharm) and saccharin (≥99.0%, Sinopharm) were also added into this electrolyte to reach a concentration of 40 g L<sup>-1</sup> and 1 g L<sup>-1</sup>, respectively. The electrodeposition was conducted under a constant potential of -1.0 V (vs. Ag/AgCl) for one hour. Afterward, the sample was carefully taken out from the electrolyte, rinsed with DI water, and dried in air (denoted as NiFeMo/NF). In addition, we synthesized NiFeMo catalysts with different doping concentrations (15:4:1, 12:2:1, 6:1:1, 12:1:2) by altering the ratio of Mo to Fe in the solution while keeping the total concentration of cation content and Ni content unchanged. Catalysts denoted as Ni, NiFe and NiMo were obtained by electrodeposition in the electrolytes with the absence of Fe, Mo ions, Mo ions or Fe ions in the electrolyte, respectively.

### **Material characterization**

The phase compositions of the prepared samples were achieved using X-ray diffraction (XRD) with Cu K $\alpha$  radiation ( $\lambda = 0.154$  nm) at 40 kV and 40 mA. The structural and morphological characterizations were obtained with a field-emission scanning electron microscope (SEM, JEOL JSM-7800F, Japan).

under an accelerating voltage of 3kV. and a transmission electron microscope (TEM, FEI Tecnai G2F30 S-Twin) equipped with energy dispersive x-ray spectrometer (EDS). X-ray photoelectron spectra (XPS) were acquired on a Kratos spectrometer (Axis Ultra DLD) with monochromatized Al K $\alpha$  radiation ( $h\nu=1486.69\text{eV}$ ), and the calibration of binding energy was performed with C1s peak at 284.8 eV.

### **Electrochemical Measurements**

Electrochemical catalytic capability and other electrochemical properties were carried out in a three-electrode configuration in 1.0M KOH electrolyte with CHI 760D electrochemical workstation (Shanghai, China). The NF coated with electrocatalysts served as the working electrodes with a Pt foil (2cm $\times$ 2cm) as the counter electrodes and Hg/HgO electrode as the reference electrodes, respectively. Before each electrochemical test, cyclic voltammetry (CV) from 0.9V to 1.8V at a scan rate of 100mV s $^{-1}$  for 20 cycles were performed for the fresh sample in order to stabilize the catalyst' surface. Linear sweep voltammetry curves (LSVs) were obtained within a potential range from 1.0 to 1.8V versus reversible hydrogen electrode (RHE) at a sweep rate of 5mV/s. Electrochemical impedance spectroscopy (EIS) was acquired at 1.5V versus RHE in a frequency range from 200 kHz to 50 mHz with an amplitude of 10mV. All polarization curves were obtained under 90% iR-compensation to exclude the ohmic losses of the solution. The electrochemically active specific area (ECSA) can accurately reflect the amount of active sites, which was estimated based on double-layer capacitance ( $C_{dl}$ ). Briefly, the CVs within the non-Faradaic regions between 0.05 and 0.15V (vs. Hg/HgO) are recorded at different scan rates. By plotting capacitive current  $(j_{anodic}-j_{cathodic})/2$  at 0.1V (vs. Hg/HgO) against the sweep rate, a linear trend was obtained, and the  $C_{dl}$  value was given by the slope of the straight line. The ECSA can be obtained by the following formula:

$$ECSA = \frac{C_{dl}(Catalyst)}{C_s}$$

Where  $C_s$  is the specific capacitance with the value of  $0.04 \text{ mF cm}^{-2}$  for an ideal flat surface<sup>1</sup>

The temperature-dependent OER tests were performed at fixed temperatures from  $10^\circ\text{C}$  to  $50^\circ\text{C}$ . The OER activation energy ( $E_a$ ) was calculated by the Arrhenius relationship<sup>2</sup>:

$$\frac{\partial \log j_k}{\partial T^{-1}} = -\frac{E_a}{2.3R}$$

where  $j_k$  is the kinetic current density,  $T$  is the absolute temperature, and  $R$  is the universal gas constant.

Turnover frequency (TOF) number specifying the extent of evolved oxygen gas per unit of time was gained by electrochemical measurements. To calculate Ni loading of catalysts, successive CV scans were performed at different scan rates from  $2.5$  to  $15 \text{ mV s}^{-1}$  in the potential range covering the oxidation and reduction potential of Ni ( $0.25$ - $0.6 \text{ V vs Hg/HgO}$ ) in  $1.0\text{M KOH}$ . The obtained slope from the linear regression of the recorded oxidation current responses versus scan rate gives the mole number of Ni active sites:

$$\text{Slope} = \frac{n^2 F^2 A \Gamma}{4RT}$$

in which  $n$  refers to the number of electrons transferred during the oxidation of  $\text{Ni}^{2+}$  to  $\text{Ni}^{3+}$  ( $n=1$ ),  $F$  is the Faradic constant,  $A$  is the geometrical area of the electrode ( $1 \text{ cm}^2$ ),  $\Gamma$  is moles per unit area for Ni active sites ( $\text{mol cm}^{-2}$ ),  $R$  and  $T$  represent the universal gas constant and absolute temperature, respectively.  $m$  is the number of moles for Ni on the surface participating in the OER and can be obtained by multiplying  $A$  by  $\Gamma$ .

$$m = A \times \Gamma$$

Afterwards, the TOF values based on Ni active sites were derived according to equation:

$$\text{TOF} = \frac{jA}{4Fm}$$

Where  $j$  is the current density ( $\text{A cm}^{-2}$ ) of catalysts at a fixed overpotential,  $A$  is the surface area ( $1 \text{ cm}^2$ ),  $4$  indicates the four-electron transfer process in OER,  $F$  is the Faradic constant, and  $m$  presents Ni mole loading.

Faraday efficiency (FE) was evaluated by comparing the experimental gas production with the theoretical gas production. The FE was calculated by  $FE = n_{ex}/n_{th}$ , where  $n_{ex}$  is the produced moles of oxygen and  $n_{th}$  is the theoretical moles of oxygen. The experimental molar volume of gas can be calculated by  $n_{ex} = V/V_m$ , where  $V$  is volume of the measured gas and  $V_m$  is the molar volume. The volume of oxygen can be measured by the water drainage method. The theoretical moles of oxygen can be calculated by  $N_{th} = Q/(n \times F)$ , where  $Q$  is total amount of electrical charge,  $F$  is Faradic constant ( $96485.3 \text{ C mol}^{-1}$ ), and  $n$  is 4 for oxygen.

### **Operando Raman Electrochemical Experiments**

Operando Raman spectrum were acquired using a confocal HORIBA micro-Raman spectroscopy system with a 633 nm laser excitation. The acquisition time for different catalysts was 20 s with spectral range from 200 to  $800 \text{ cm}^{-1}$ . A three-electrode system consists of the NF deposited with NiFe and NiFeMo (oxy)hydroxides as working electrode, a Pt foil as counter electrode and a silver foil as quasi reference electrode (QRE), which was soaked in 1M KOH electrolyte. Setup and description are available in Figure S1. Because the operando Raman cell have specific geometry and limited space for a standard reference electrode, so an Ag foil was used as a quasi-reference electrode, which exhibit the same electrochemical behavior.<sup>3-5</sup> The potential-dependent in situ Raman spectra were recorded by sweeping the potential with a step of 0.1V and a settling time of 2 min.

### **Computational Methods**

The Vienna Abinitio Simulation Package (VASP) based on Density functional theory (DFT) was employed in the entire calculations.<sup>6-7</sup> Spin polarization was taken into account. Perdew-Burke-Ernzerhof exchange-correlation functional within generalized gradient approximation was applied while a plane-wave basis set was implemented in the framework of the projector augmented wave (PAW) method to represented the core and valence electrons with a kinetic

cutoff energy of 400 eV.<sup>8-9</sup> The atomic structures were fully relaxed until energy and forces were converged to  $10^{-5}$  eV  $\text{\AA}^{-1}$  and 0.02 eV  $\text{\AA}^{-1}$ , respectively. To overcome the known self-interaction error in DFT and to make the bandgap close to experiment, the DFT+U ( $U_{\text{eff}} = 6.2$  eV, 4.6 eV and 2.4 eV for Ni, Fe and Mo atoms, respectively.) method was used to treat the 3d electrons of the transition metal.<sup>10</sup> A  $3 \times 4 \times 1$  Monkhorst-Pack k-point mesh was employed to sample the Brillouin zone for all surface model. All calculations were performed on a (001) slab model with  $1 \times 2$  surface cell, containing atomic layers and a vacuum layer of 15  $\text{\AA}$  thickness to avoid artificial interaction between periodic images. In order to improve the description of van der Waals interaction, DFT-D3 correction was employed.<sup>11</sup>

The OH\*, O\*, and OOH\* adsorption free energy ( $\Delta G_s$ ) on disparate active sites can be defined as equation (1):

$$\Delta G_s = \Delta E_s + \Delta E_{\text{ZPE}} - T\Delta S_s \quad (1)$$

Where  $\Delta E_s$  is the hydrogen adsorption energy,  $\Delta E_{\text{ZPE}}$  is the difference in zero point energy between the surface species and dissociative species, T is the temperature (degree kelvin, K), and  $S_s$  is the entropy change between the adsorbed state of the system and the gas phase standard state. At this point, the  $\Delta G_s$  of different sites can be acquired. Vaspkit code is used for post-computation.

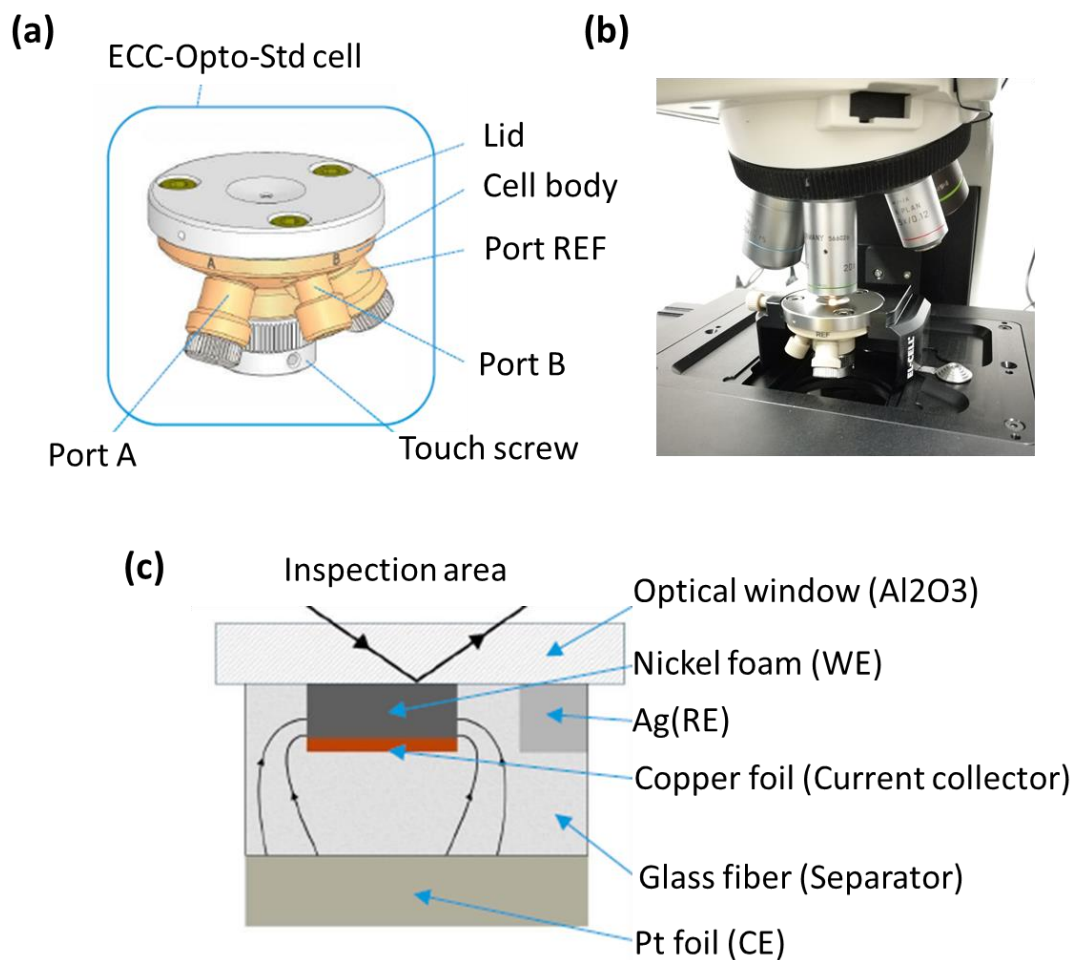

Figure S1 ECC-Opto-Std test cell serves to monitor the optical properties of an electrode material in the course of electrochemical processing. For this purpose, the working electrode (WE) material is placed right below the optical window. Ag foil and Pt foil was used as reference electrode and counter electrode, respectively.

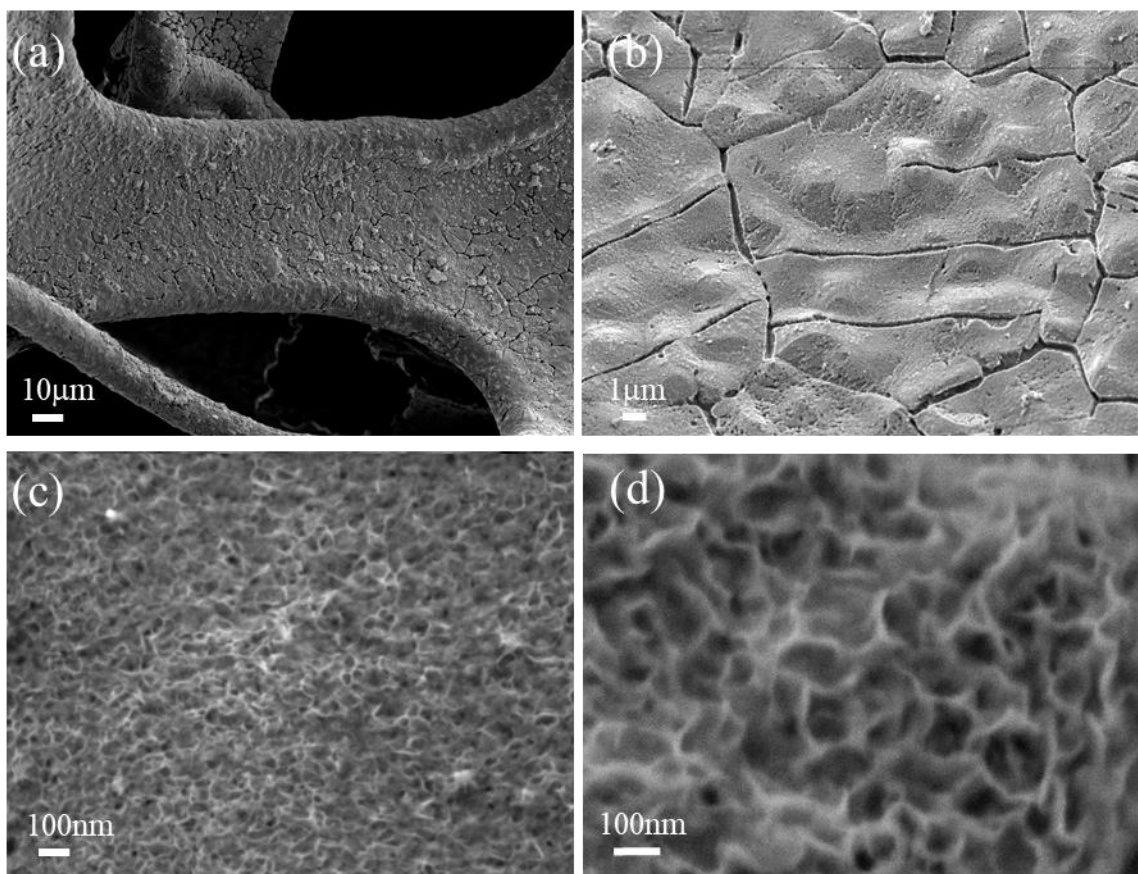

Figure S2. SEM images of NiFe/NF with different magnification.



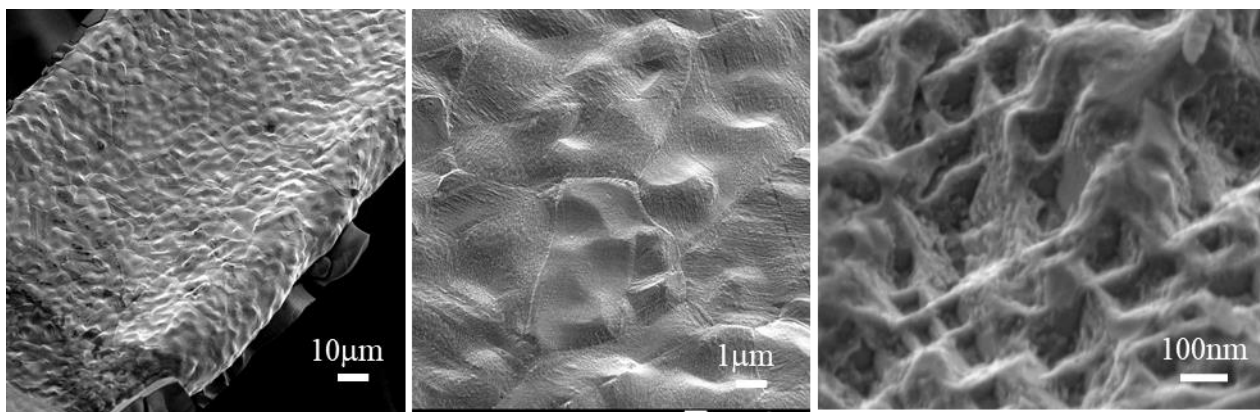

Figure S3. SEM images of NiFeMo/NF with different magnification.

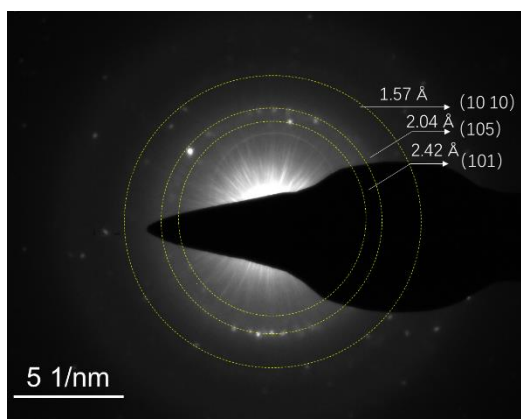

Figure S4 The corresponding SAED pattern in Figure-1(f)

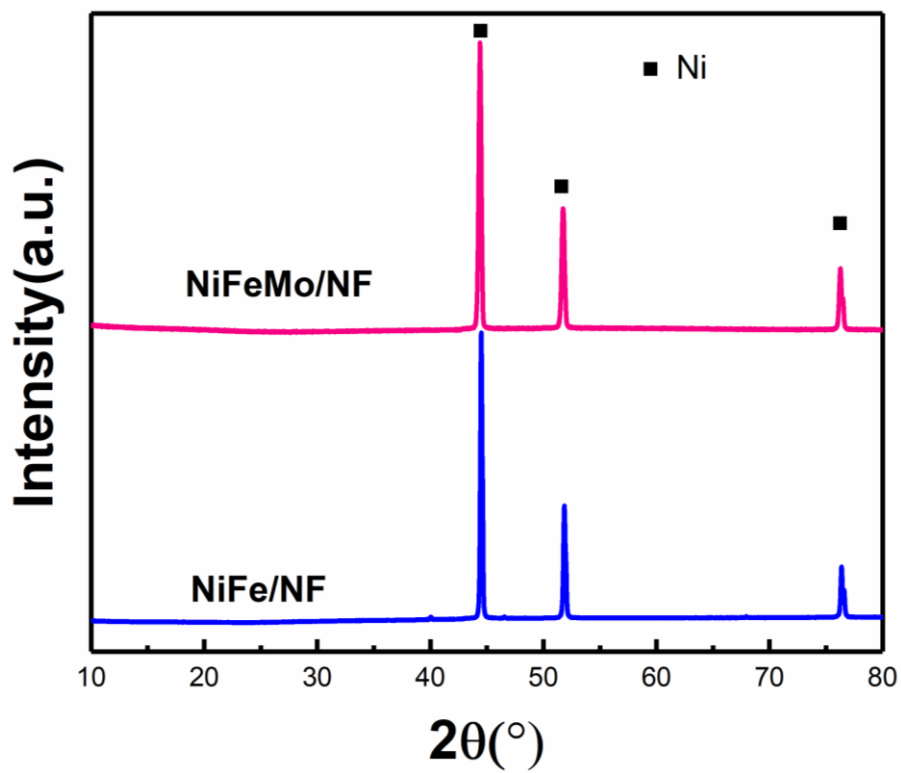

Figure S5 XRD patterns of NiFe/NF and NiFeMo/NF

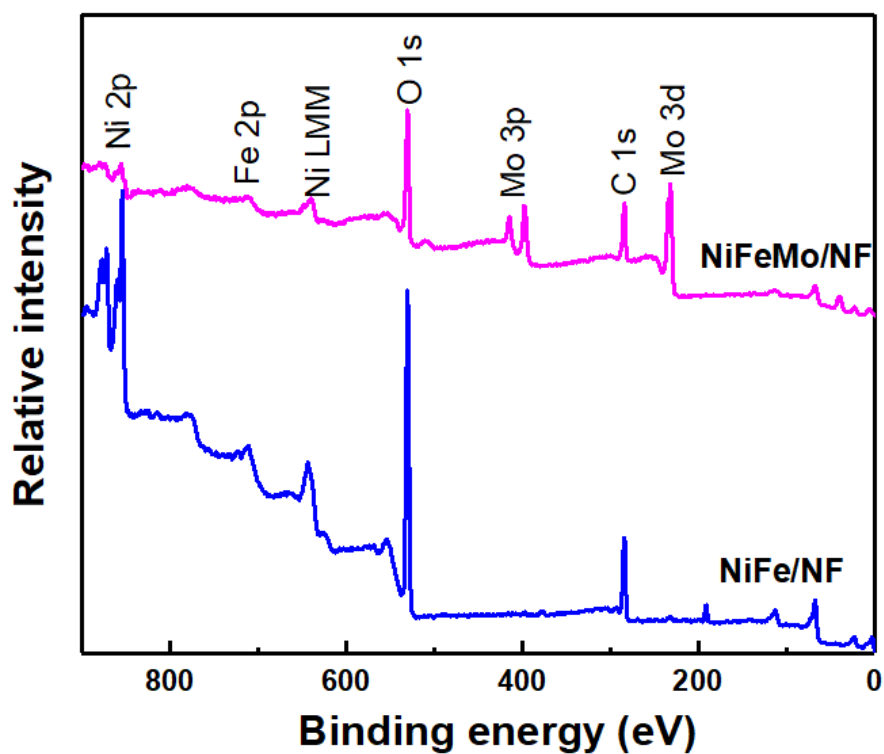

Figure S6 Survey XPS spectra of NiFe and NiFeMo catalysts.

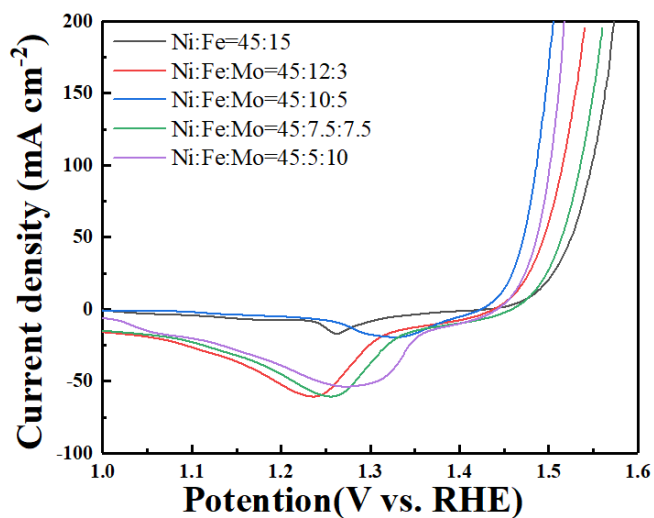

Figure S7 Polarization curves of the NiFeMo/NF catalysts with different raw material feed ratio. When the ratio is 9:2:1 (45:10:5), NiFeMo shows the best performance

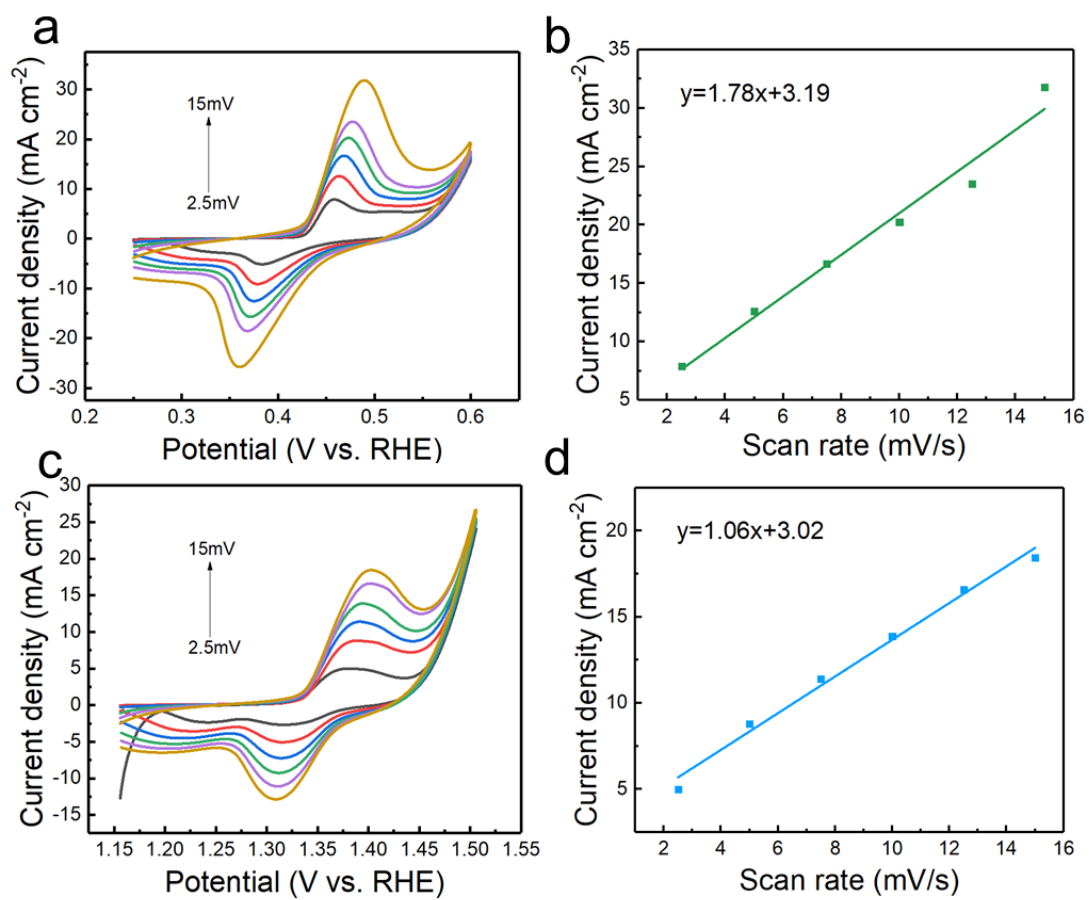

Figure S8 CV scans of Ni redox and the corresponding anodic charging currents as a function of scan rate in (a) and (b) NiFe/NF, as well as (c) and (d) NiFeMo/NF prior to OER.

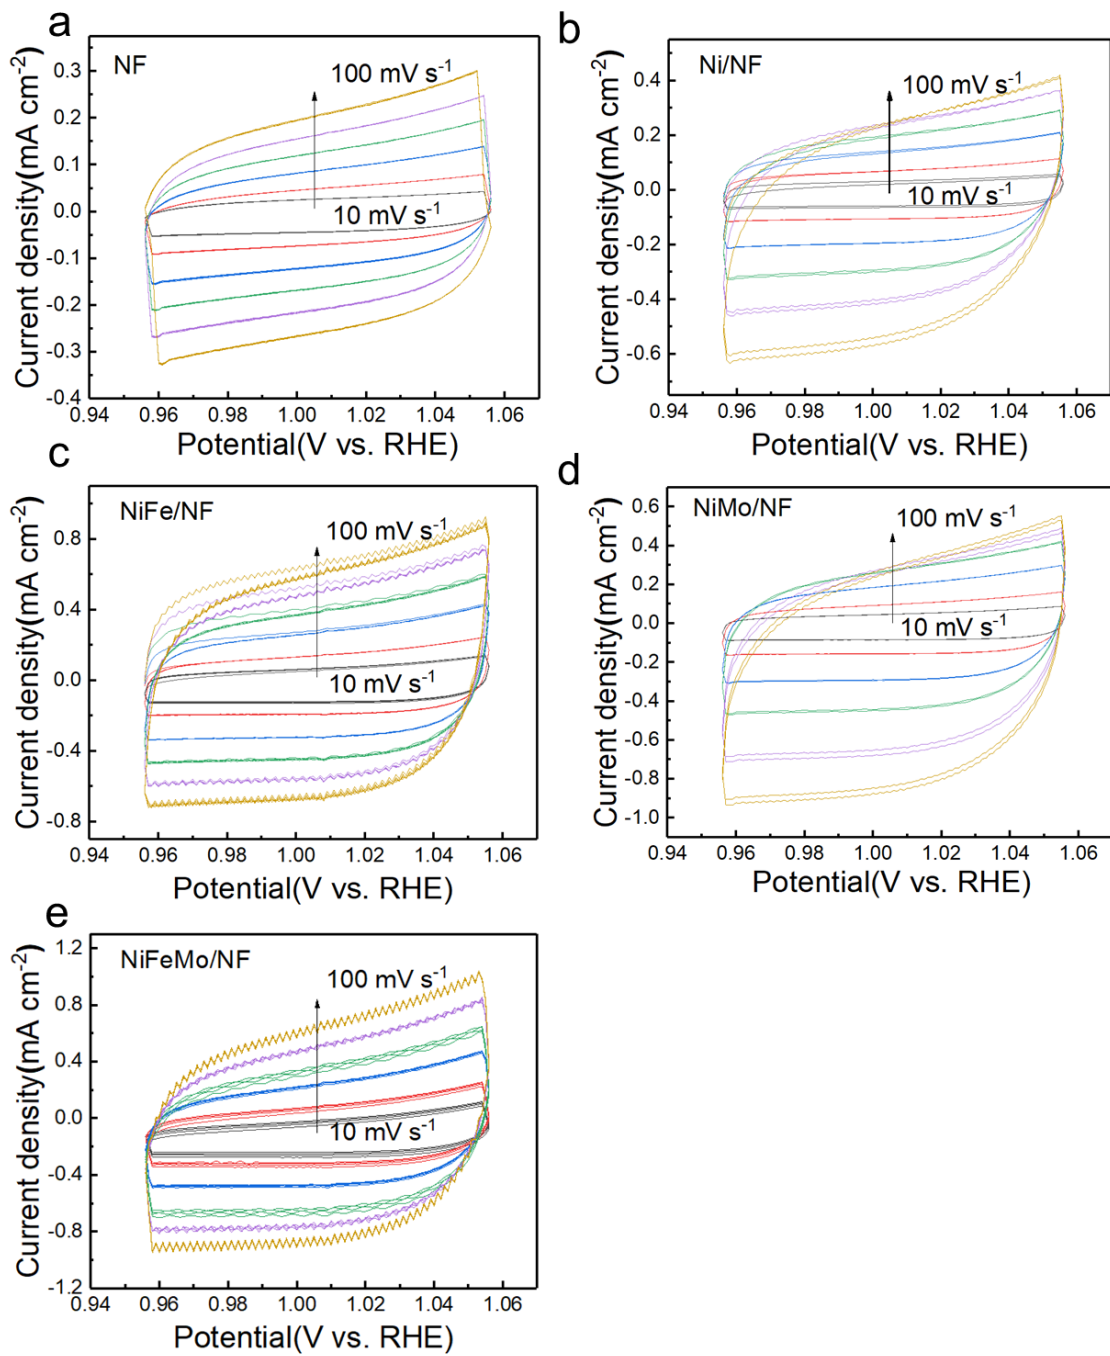

Figure S9 CV curves for different electrocatalysts carried out in non-faradic regions at different scan rates in 1M KOH

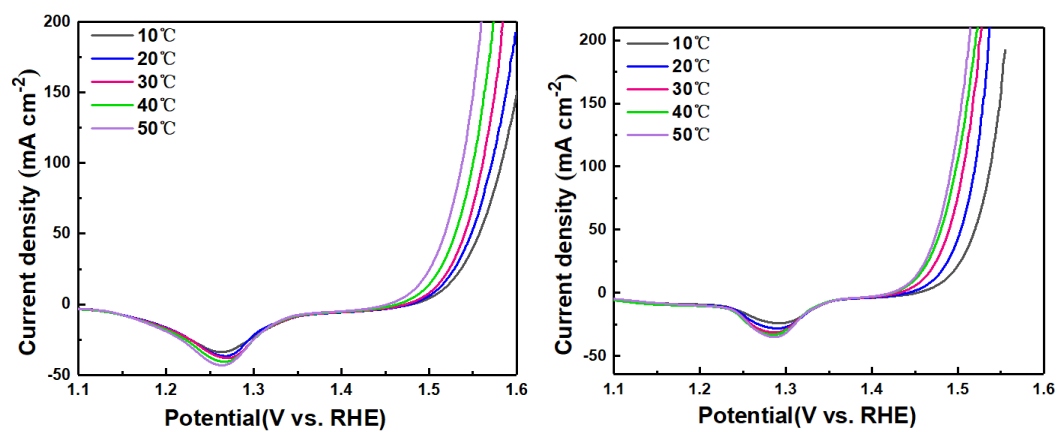

Figure S10 The temperature dependent LSV curves for both (a)NiFe and (b)NiFeMo catalysts.

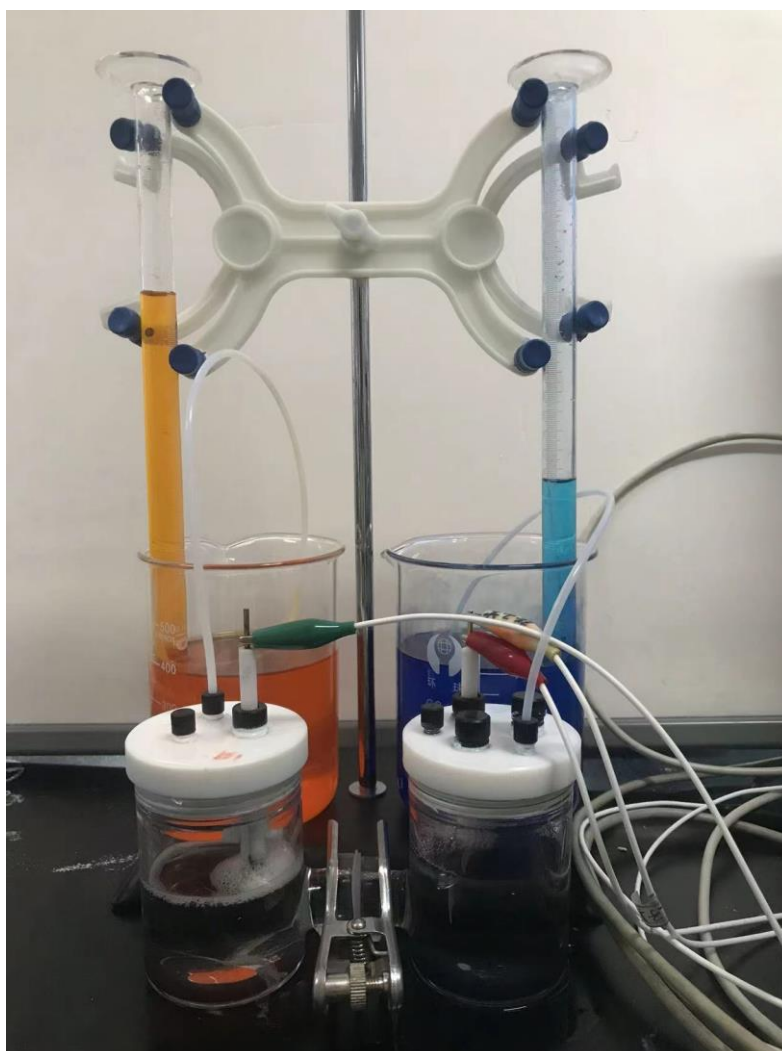

. FigureS11 Faradic efficiency test device.

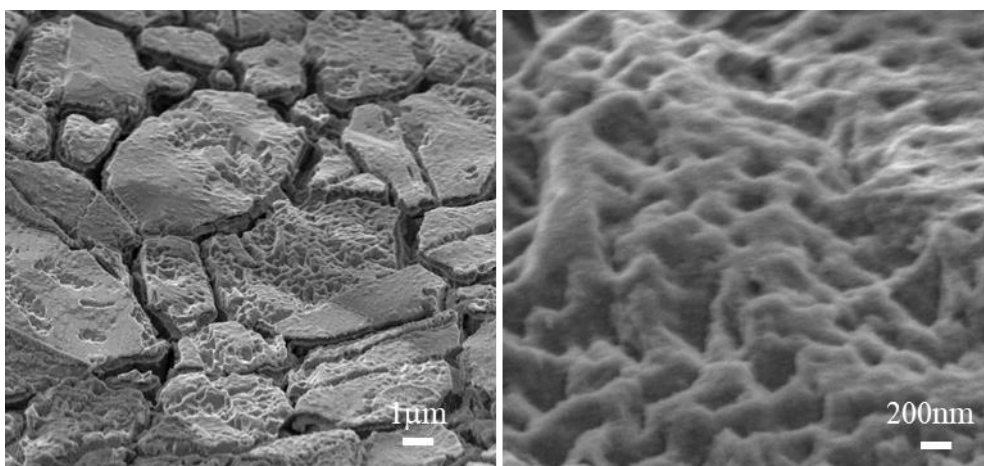

Figure S12 SEM images of NiFeMo/NF after OER stability test for 16.7h with different magnification

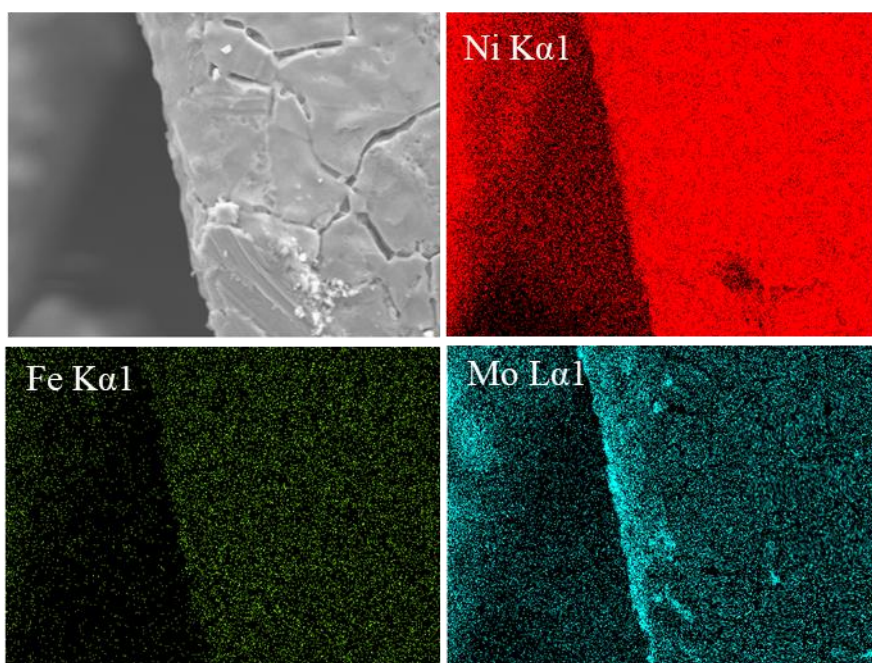

Figure S13. SEM image and corresponding EDX mapping images of the NiFeMo/NF after the OER stability test for 16.7 h..

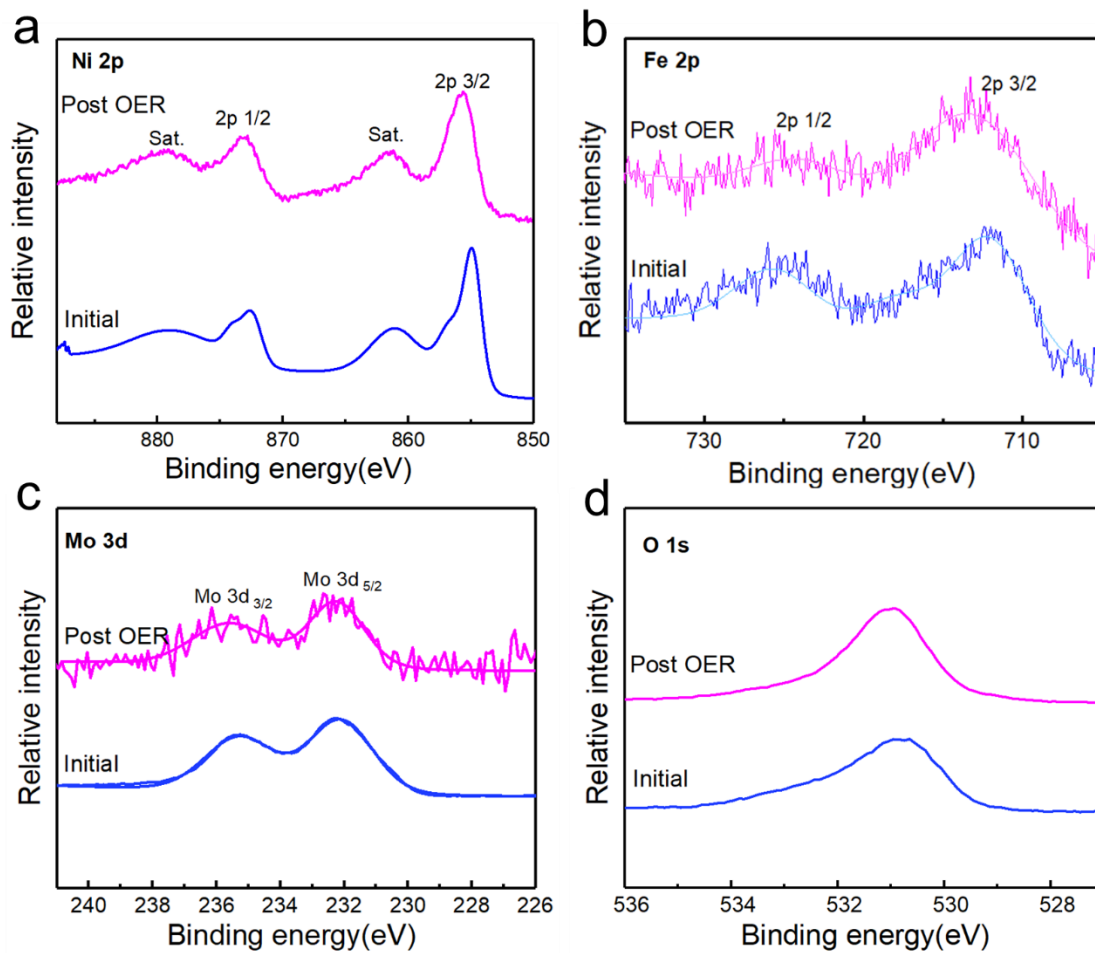

Figure S14 XPS spectra comparison of fresh NiFeMo/NF electrocatalyst and NiFeMo/NF electrocatalysts after the OER stability tests. Ni 2p (a), Fe 2p (b), Mo 3d (c) and O 1s (d).

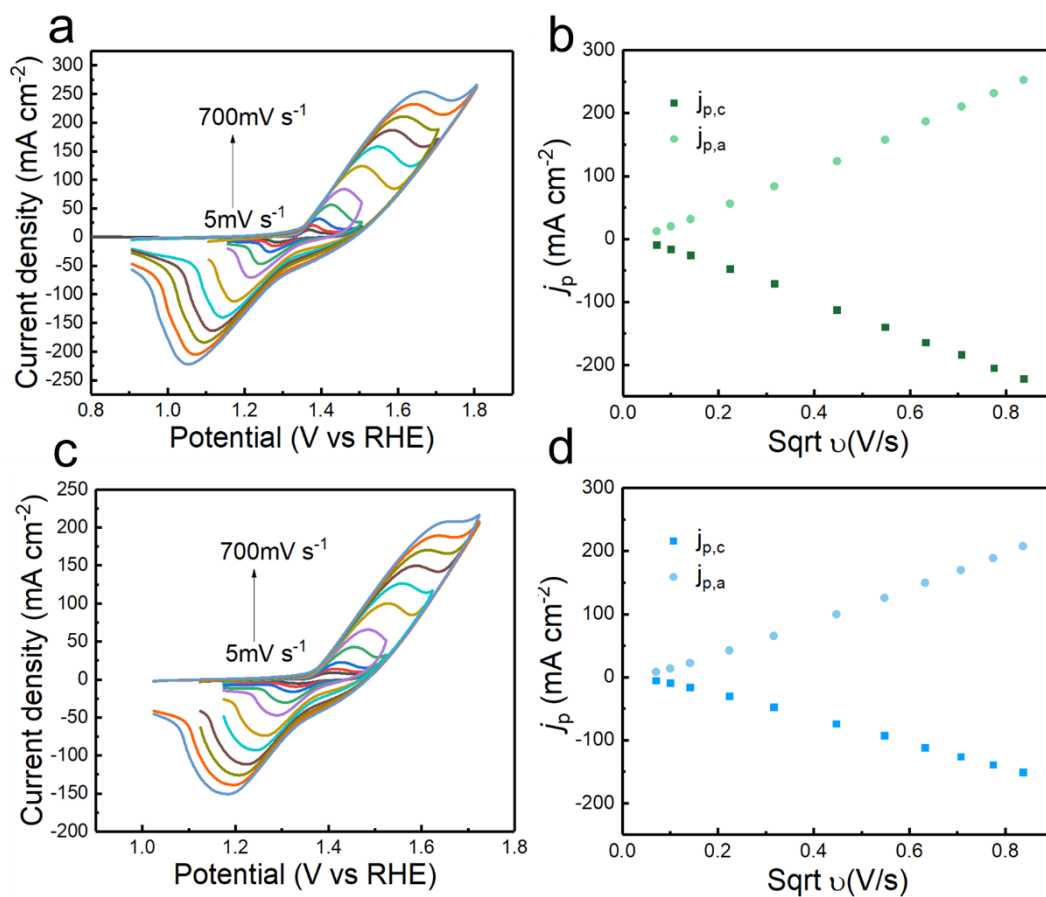

Figure S15. Laviron analysis: variation of Ni redox pair as a function of CV scan rate with 5,10,20,50,100,200,300,400,500,600,700 mV s<sup>-1</sup> in (a) NiFe/NF and (c) NiFeMo/NF. The peak current response for Ni redox pair as a function of square root of scan rate in (b)NiFe/NF and (d)NiFeMo/NF.



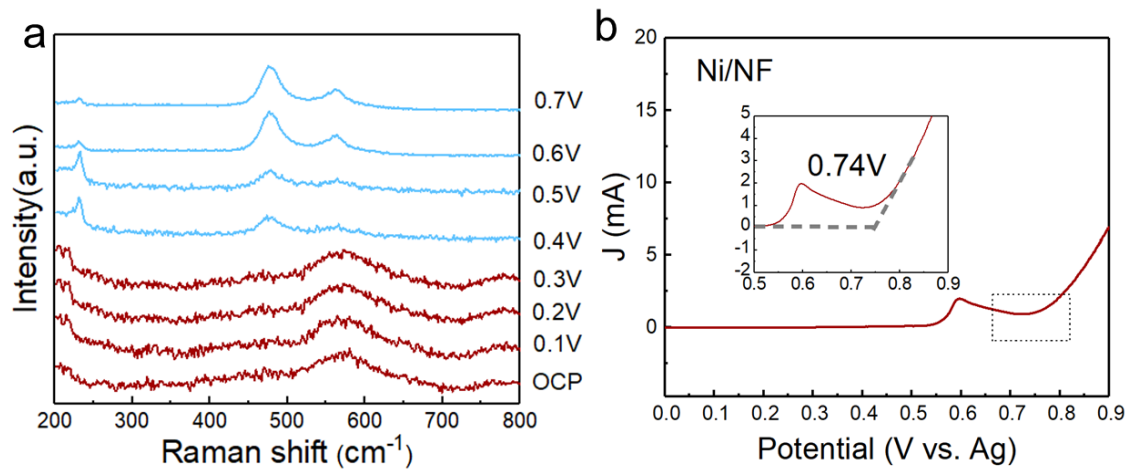

Figure S16 (a) Operando Raman spectra of Ni/NF sample under various potential. (b) The corresponding polarization curves of Ni/NF.

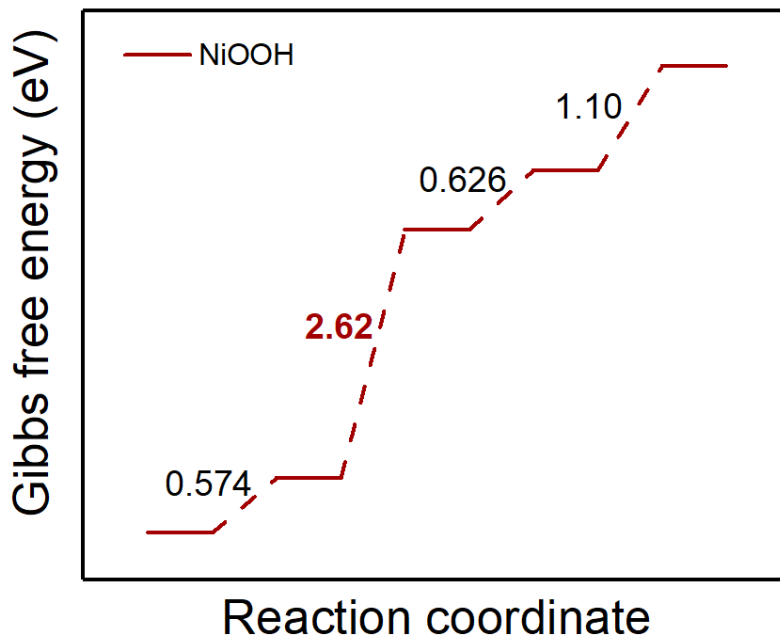

Figure S17 Gibbs free diagram of OER steps on Ni (oxy)hydroxide.

Table S1. Comparison of OER activity of NiFeMo (red words) and recently reported benchmark catalysts.

| Catalysts                                          | Support      | Electrolyte | J/mA · cm <sup>-2</sup> | Overpotential/<br>mV | Tafel/<br>mV dec <sup>-1</sup> | Ref.      |
|----------------------------------------------------|--------------|-------------|-------------------------|----------------------|--------------------------------|-----------|
| NiFeMo                                             | NF           | 1.0 M KOH   | 10                      | 215                  | 37.9                           | This work |
| NiFe                                               | NF           | 1.0 M KOH   | 10                      | 250                  | 53.4                           | This work |
| Amorphous NiFeMo                                   | NF           | 1.0 M KOH   | 10                      | 255                  | 35                             | 12        |
| Ce-NiFe LDH                                        | NF           | 1.0 M KOH   | 10                      | 205                  | 37.9                           | 13        |
| Ta-NiFe LDH                                        | CFP          | 1.0 M KOH   | 50                      | 260                  | 58.95                          | 14        |
| Ni <sub>3</sub> Fe <sub>0.5</sub> V <sub>0.5</sub> | CFP          | 1.0 M KOH   | 100                     | 264                  | 39                             | 15        |
| NiFeV-LDHs                                         | NF           | 1.0 M KOH   | 10                      | 231                  | 39.4                           | 16        |
| NiFeV-LDH                                          | Ni Foam      | 1.0 M KOH   | 20                      | 195                  | 42                             | 17        |
| NiFeCr                                             | NF           | 1.0 M KOH   | Onset                   | 240                  | 36                             | 18        |
| NiFeCr-LDH                                         | CFP          | 1.0 M KOH   | 25                      | 225                  | 69                             | 19        |
| Mn-doped NiFe-LDH                                  | NF           | 1.0 M KOH   | 20                      | 289                  | 47                             | 20        |
| NiFeMn-LDH                                         | CFP          | 1.0 M KOH   | 100                     | 230                  | 68.6                           | 21        |
| Ni <sub>3</sub> FeAl <sub>0.91</sub> -LDH@NF       | NF           | 1.0 M KOH   | 20                      | 304                  | 57                             | 22        |
| CoFeCr                                             | GC           | 1.0 M KOH   | 10                      | 232                  | 31                             | 23        |
| NiFeW                                              | CFP          | 1.0 M KOH   | 10                      | 239                  | 36                             | 24        |
| La-NiFe LDH                                        | NF           | 1.0 M KOH   | 10                      | 340                  | 73.7                           | 25        |
| NiFeIr-LDH                                         | GC           | 1.0 M KOH   | 20                      | ~213                 | -                              | 26        |
| Gd-NiFe LDH                                        | carbon cloth | 1.0 M KOH   | 10                      | 210                  | 40.9                           | 27        |
| NiFeRu-LDH                                         | Ni Foam      | 1.0 M KOH   | 10                      | 225                  | -                              | 28        |

Table S2. Resistance values of various samples at 1.506 V vs. RHE.

| Catalysts | $R_s / \Omega$ | $R_{ct} / \Omega$ |
|-----------|----------------|-------------------|
| NF        | 1.440          | 79.41             |
| Ni/NF     | 1.152          | 22.46             |
| NiFe/NF   | 1.110          | 1.952             |
| NiMo/NF   | 1.358          | 2.046             |
| NiFeMo/NF | 1.191          | 0.615             |

Table S3. Elemental contributions on NiFe and NiFeMo electrode.

| Catalysts    | <i>XPS</i> | <i>EDS/atomic percentage</i> |
|--------------|------------|------------------------------|
| Ni in NiFe   | 78%        | 81%                          |
| Fe in NiFe   | 22%        | 19%                          |
| Ni in NiFeMo | 74%        | 78%                          |
| Fe in NiFeMo | 11%        | 10%                          |
| Mo in NiFeMo | 15%        | 12%                          |

From XPS fitting, as the Ni<sup>0</sup> on the substrate, Ni content should contribute more than the real content in NiFeMo and NiFe hydroxide thin film.

## Reference

1. Liang, H.; Gandi, A. N.; Anjum, D. H.; Wang, X.; Schwingenschlögl, U.; Alshareef, H. N., Plasma-Assisted Synthesis of NiCoP for Efficient Overall Water Splitting. *Nano Letters* **2016**, *16* (12), 7718-7725.
2. Zhou, M.; Weng, Q.; Zhang, X.; Wang, X.; Xue, Y.; Zeng, X.; Bando, Y.; Golberg, D., In situ electrochemical formation of core-shell nickel-iron disulfide and oxyhydroxide heterostructured catalysts for a stable oxygen evolution reaction and the associated mechanisms. *Journal of Materials Chemistry A* **2017**, *5* (9), 4335-4342.
3. Bo, X.; Li, Y.; Chen, X.; Zhao, C., Operando Raman Spectroscopy Reveals Cr-Induced-Phase Reconstruction of NiFe and CoFe Oxyhydroxides for Enhanced Electrocatalytic Water Oxidation. *Chemistry of Materials* **2020**, *32* (10), 4303-4311.
4. Ge, M.; Hussain, G.; Hibbert, D. B.; Silvester, D. S.; Zhao, C., Ionic Liquid - based Microchannels for Highly Sensitive and Fast Amperometric Detection of Toxic Gases. *Electroanalysis* **2018**, *31* (1), 66-74.
5. Gunawan, C. A.; Ge, M.; Zhao, C., Robust and versatile ionic liquid microarrays achieved by microcontact printing. *Nature Communications* **2014**, *5* (1).
6. Hacene, M.; Anciaux-Sedrakian, A.; Rozanska, X.; Klahr, D.; Guignon, T.; Fleurat-Lessard, P., Accelerating VASP electronic structure calculations using graphic processing units. *Journal of Computational Chemistry* **2012**, *33* (32), 2581-2589.
7. Hutchinson, M.; Widom, M., VASP on a GPU: Application to exact-exchange calculations of the stability of elemental boron. *Computer Physics Communications* **2012**, *183* (7), 1422-1426.
8. Perdew, J. P.; Burke, K.; Ernzerhof, M., Generalized Gradient Approximation Made Simple. *PHYSICAL REVIEW LETTERS* **1996**, *77* (18), 4.
9. Monkhorst, H. J.; Pack, J. D., Special points for Brillouin-zone integrations. *Physical Review B* **1976**, *13* (12), 5188-5192.
10. Liechtenstein, A. I.; Anisimov, V. I.; Zaanen, J., Density-functional theory and strong interactions: Orbital ordering in Mott-Hubbard insulators. *Physical Review B* **1995**, *52* (8), R5467-R5470.
11. Wang, V.; Xu, N.; Liu, J.-C.; Tang, G.; Geng, W.-T., VASPKIT: A user-friendly interface facilitating high-throughput computing and analysis using VASP code. *Computer Physics Communications* **2021**, 267.
12. Li, Y. K.; Zhang, G.; Lu, W. T.; Cao, F. F., Amorphous Ni-Fe-Mo Suboxides Coupled with Ni Network as Porous Nanoplate Array on Nickel Foam: A Highly Efficient and Durable Bifunctional Electrode for Overall Water Splitting. *Adv Sci (Weinh)* **2020**, *7* (7), 1902034.
13. Liu, M.; Min, K. A.; Han, B.; Lee, L. Y. S., Interfacing or Doping? Role of Ce in Highly Promoted Water Oxidation of NiFe - Layered Double Hydroxide. *Advanced Energy Materials* **2021**.
14. Wang, X.; Tuo, Y.; Zhou, Y.; Wang, D.; Wang, S.; Zhang, J., Ta-doping triggered electronic structural engineering and strain effect in NiFe LDH for enhanced water oxidation. *Chemical Engineering Journal* **2021**, 403.
15. Jiang, J.; Sun, F.; Zhou, S.; Hu, W.; Zhang, H.; Dong, J.; Jiang, Z.; Zhao, J.; Li, J.; Yan, W.; Wang, M., Atomic-level insight into super-efficient electrocatalytic oxygen evolution on iron and vanadium co-doped nickel (oxy)hydroxide. *Nat Commun* **2018**, *9* (1), 2885.
16. Dinh, K. N.; Zheng, P.; Dai, Z.; Zhang, Y.; Dangol, R.; Zheng, Y.; Li, B.; Zong, Y.; Yan, Q., Ultrathin Porous NiFeV Ternary Layer Hydroxide Nanosheets as a Highly Efficient Bifunctional Electrocatalyst for Overall Water Splitting. *Small* **2018**, *14* (8).

17. Li, P.; Duan, X.; Kuang, Y.; Li, Y.; Zhang, G.; Liu, W.; Sun, X., Tuning Electronic Structure of NiFe Layered Double Hydroxides with Vanadium Doping toward High Efficient Electrocatalytic Water Oxidation. *Advanced Energy Materials* **2018**, *8* (15).
18. Bo, X.; Hocking, R. K.; Zhou, S.; Li, Y.; Chen, X.; Zhuang, J.; Du, Y.; Zhao, C., Capturing the active sites of multimetallic (oxy)hydroxides for the oxygen evolution reaction. *Energy & Environmental Science* **2020**, *13* (11), 4225-4237.
19. Yang, Y.; Dang, L.; Shearer, M. J.; Sheng, H.; Li, W.; Chen, J.; Xiao, P.; Zhang, Y.; Hamers, R. J.; Jin, S., Highly Active Trimetallic NiFeCr Layered Double Hydroxide Electrocatalysts for Oxygen Evolution Reaction. *Advanced Energy Materials* **2018**, *8* (15), 1703189.
20. Lu, Z.; Qian, L.; Tian, Y.; Li, Y.; Sun, X.; Duan, X., Ternary NiFeMn layered double hydroxides as highly-efficient oxygen evolution catalysts. *Chemical communications* **2016**, *52* (5), 908-11.
21. Zhou, D.; Cai, Z.; Jia, Y.; Xiong, X.; Xie, Q.; Wang, S.; Zhang, Y.; Liu, W.; Duan, H.; Sun, X., Activating basal plane in NiFe layered double hydroxide by Mn<sup>2+</sup> doping for efficient and durable oxygen evolution reaction. *Nanoscale Horizons* **2018**.
22. Liu, H.; Wang, Y.; Lu, X.; Hu, Y.; Zhu, G.; Chen, R.; Ma, L.; Zhu, H.; Tie, Z.; Liu, J.; Jin, Z., The effects of Al substitution and partial dissolution on ultrathin NiFeAl ternary layered double hydroxide nanosheets for oxygen evolution reaction in alkaline solution. *Nano Energy* **2017**, *35*, 350-357.
23. Chen, J.; Li, H.; Chen, S.; Fei, J.; Liu, C.; Yu, Z.; Shin, K.; Liu, Z.; Song, L.; Henkelman, G.; Wei, L.; Chen, Y., Co-Fe-Cr (oxy)Hydroxides as Efficient Oxygen Evolution Reaction Catalysts. *Advanced Energy Materials* **2021**, *11* (11).
24. Ding, L.; Li, K.; Xie, Z.; Yang, G.; Yu, S.; Wang, W.; Yu, H.; Baxter, J.; Meyer, H. M.; Cullen, D. A.; Zhang, F.-Y., Constructing Ultrathin W-Doped NiFe Nanosheets via Facile Electrosynthesis as Bifunctional Electrocatalysts for Efficient Water Splitting. *ACS Applied Materials & Interfaces* **2021**, *13* (17), 20070-20080.
25. Yu, J.; Lu, K.; Wang, C.; Wang, Z.; Fan, C.; Bai, G.; Wang, G.; Yu, F., Modification of NiFe Layered Double Hydroxide by Lanthanum Doping for Boosting Water Splitting. *Electrochimica Acta* **2021**.
26. Chen, Q. Q.; Hou, C. C.; Wang, C. J.; Yang, X.; Shi, R.; Chen, Y., Ir(4+)-Doped NiFe LDH to expedite hydrogen evolution kinetics as a Pt-like electrocatalyst for water splitting. *Chem Commun (Camb)* **2018**, *54* (49), 6400-6403.
27. Li, M.; Li, H.; Jiang, X.; Jiang, M.; Zhan, X.; Fu, G.; Lee, J.-M.; Tang, Y., Gd-induced electronic structure engineering of a NiFe-layered double hydroxide for efficient oxygen evolution. *Journal of Materials Chemistry A* **2021**, *9* (5), 2999-3006.
28. Chen, G.; Wang, T.; Zhang, J.; Liu, P.; Sun, H.; Zhuang, X.; Chen, M.; Feng, X., Accelerated Hydrogen Evolution Kinetics on NiFe-Layered Double Hydroxide Electrocatalysts by Tailoring Water Dissociation Active Sites. *Advanced materials* **2018**, *30* (10).
